1 **Responses of global waterbird populations to climate change vary with latitude**

2 Tatsuya Amano<sup>1,2,3\*</sup>, Tamás Székely<sup>4,5</sup>, Hannah S. Wauchope<sup>2</sup>, Brody Sandel<sup>6</sup>, Szabolcs

3 Nagy<sup>7</sup>, Taej Mundkur<sup>7</sup>, Tom Langendoen<sup>7</sup>, Daniel Blanco<sup>8</sup>, Nicole L. Michel<sup>9</sup>, William J.

4 Sutherland<sup>2,10</sup>

5

6 <sup>1</sup> School of Biological Sciences, University of Queensland, Brisbane, 4072 Queensland,

7 Australia

8 <sup>2</sup> Conservation Science Group, Department of Zoology, University of Cambridge, The David

9 Attenborough Building, Pembroke Street, Cambridge, CB2 3QZ, UK.

10 <sup>3</sup> Centre for the Study of Existential Risk, University of Cambridge, 16 Mill Lane, Cambridge,

11 CB2 1SG, UK.

12 <sup>4</sup> Milner Centre for Evolution, Department of Biology and Biochemistry, University of Bath,

13 Bath BA2 7AY, UK.

14 <sup>5</sup> Department of Evolutionary Zoology, University of Debrecen, Debrecen, H-4010, Hungary.

15 <sup>6</sup> Department of Biology, Santa Clara University. 500 El Camino Real, Santa Clara California,

16 95053, USA.

17 <sup>7</sup> Wetlands International Global Office, Horapark 9, 6717 LZ Ede, The Netherlands.

18 <sup>8</sup> Wetlands International Argentina, 25 de Mayo 758 10 I, Buenos Aires 1002, Argentina.

19 <sup>9</sup> National Audubon Society, Conservation Science, 220 Montgomery St., Suite 1000, San

20 Francisco, CA 94104, USA.

21 <sup>10</sup> BioRISC, St Catharine's College, Cambridge CB2 1RL, UK

22 **Abstract**

23 While climate change continues to present a major threat to global biodiversity and  
24 ecosystems, most research on climate change impacts do not have the resolution to detect  
25 changes in species abundance and are often limited to temperate ecosystems. This limits our  
26 understanding of global responses in species abundance—a determinant of ecosystem  
27 function and services—to climate change including in the highly-biodiverse tropics. We  
28 address this knowledge gap by quantifying abundance responses to climate change in  
29 waterbirds, an indicator taxon of wetland biodiversity, at 6,822 sites between -55° and 64°.  
30 Using 1,303,651 count records since 1990 of 390 species, we show that with temperature  
31 increase, the abundance of species and populations decreased at lower latitudes, particularly  
32 in the tropics, but increased at higher latitudes. These contrasting responses to temperature  
33 increase according to latitude indicate potential global-scale poleward shifts of species  
34 abundance under climate change, providing empirical support for predictions by earlier  
35 studies. The negative responses to temperature increase in tropical species and populations  
36 are of conservation concern, as they are often also threatened by other anthropogenic factors.  
37 Our results suggest that existing biases in studies towards temperate regions could  
38 underestimate the impact of climate change on waterbirds and other species.

39

40 **Introduction**

41 Climate change continues to pose various serious threats to biodiversity, and there is an  
42 urgent need to understand how species respond to changing climates globally. A wide range  
43 of species have already shown responses to climate change, such as changes in geographical

44 range<sup>1</sup>, phenology<sup>2</sup> and abundance<sup>3</sup>. However, the rate and direction of these responses vary  
45 greatly among species and locations<sup>1,2,4</sup>. As climate-driven changes in biodiversity are  
46 expected to affect ecosystem functioning, human well-being, and the dynamics of climate  
47 change itself<sup>5</sup>, understanding how species' responses to climate change may vary globally  
48 could provide crucial evidence for a more effective allocation of limited resources on a  
49 priority basis for the conservation of species and ecosystems threatened the most by climate  
50 change, and for assessing how climate-driven changes in biodiversity may affect human  
51 societies.

52 Existing gaps in the geographical coverage of available evidence seriously limit our  
53 understanding of species' responses to climate change and its variations across the globe<sup>6</sup>.  
54 Earlier global reviews of species' responses to climate change have rarely incorporated  
55 species and studies in the tropics, due to the lack of relevant information<sup>7</sup>. Such geographical  
56 biases are even more prominent in studies investigating responses in species abundance<sup>8,9</sup>,  
57 which is a major determinant of species extinction risk<sup>10</sup>, ecosystem function and services<sup>11</sup>.  
58 Research on abundance responses to climate change to date has largely been conducted in  
59 Europe, North America and the Arctic<sup>3,12-14</sup>, with a recent global study showing a link  
60 between climate warming and abundance declines in birds and mammals<sup>8</sup>. As a result,  
61 although tropical species are predicted to be more vulnerable to increasing temperature<sup>15</sup>,  
62 there is still little empirical evidence on how responses in species abundance to climate  
63 change vary among and within species at the global scale.

64 Here we address this challenge by modelling global time-series data of waterbird species  
65 to estimate their abundance responses to changes in temperature and precipitation. The global

66 dataset of waterbird abundance changes used is based on long-term surveys in over 100  
67 countries and covers regions for which there is little information on climate change impacts,  
68 such as the tropics<sup>16</sup>. Waterbirds can also serve as an indicator taxon for assessing the status  
69 of biodiversity in wetland ecosystems, which have been lost at higher rates than other  
70 ecosystems, despite their high levels of biodiversity and productivity as well as the crucial  
71 ecosystem functions and services delivered<sup>17</sup>.

72 Using 1,303,651 count records collected since 1990 on 390 waterbird species at 6,822  
73 sites between -55° and 64° (Figure S1) we first estimated, for each species at each site, (i) the  
74 rate of abundance changes with increasing temperature and precipitation as regression  
75 coefficients (responses to temperature and precipitation increases), and (ii) the proportion of  
76 abundance changes that can be explained independently by temperature and precipitation  
77 changes (measured as  $R^2$ ), estimated with hierarchical partitioning<sup>18</sup> (the importance of  
78 temperature and precipitation). We then tested multiple hypotheses that are rarely explored at  
79 the global scale (Supplementary Tables S1 and S2), to examine among- and within-species  
80 variations in responses to temperature and precipitation increases as well as the importance of  
81 temperature and precipitation across latitudes.

## 82 **Results**

83 Applying the Gompertz model of population growth to the global waterbird dataset enabled  
84 us to estimate abundance responses to the changes in temperature and precipitation at  $1^\circ \times 1^\circ$   
85 grid cells across latitudes, including the tropics, for a wide range of waterbird groups. Of the  
86 390 species analysed, 144 species (36.9%) had at least one estimate in the tropics and 129

87 species (33.1%) had their absolute latitudinal range mid-points in the tropics (defined as  
88 tropical species; Figure 1).

89 Many species showed considerable spatial variation in abundance responses to  
90 temperature increases within their geographical ranges, with particularly negative responses  
91 in the tropics (Figure 1), although the importance of temperature in explaining abundance  
92 changes tended to be low across the ranges, with an overall median  $R^2$  of 0.057  
93 (Supplementary Data S1 and S2). In contrast, for most species there was no clear  
94 geographical pattern in abundance responses to precipitation increases, and precipitation was  
95 found to have a low importance in explaining abundance changes (the overall median  $R^2 =$   
96 0.051; Supplementary Data S1 and S2). These geographical patterns were also evident in the  
97 distribution of abundance responses averaged across all species observed within each grid  
98 cell; species generally showed more negative responses to temperature increases at lower  
99 latitudes, such as in South and Southeast Asia (Figure 2).

100 For 213 species with estimates at ten or more grid cells, we then tested hypotheses on  
101 how responses to temperature and precipitation increases (the rate of abundance changes with  
102 increasing temperature/precipitation) and the importance of temperature and precipitation  
103 (the proportion of abundance changes that can be explained by temperature/precipitation  
104 changes) vary among species (among each species' estimates at latitudinal range mid-points;  
105 species-level responses) and within species (among grid cells within each species;  
106 population-level responses) along latitudes. When compared among species, abundance  
107 responses to temperature increases were more negative in species at lower latitudes, with  
108 69% of the tropical species showing negative responses to temperature increases (Figure 3a,

109 S2a). When compared within species, although 198 (93%) out of the 213 species showed  
110 more negative responses to temperature increases at lower latitudes, this within-species  
111 latitudinal pattern was significant only in eight of the 198 species (Figure 3b, Supplementary  
112 Data S3). The importance of temperature in explaining abundance changes also increased  
113 with latitude among species (Figure 3c, S2b) and within species for all 55 species with a  
114 significant within-species latitudinal pattern (Figure 3d, Supplementary Data S3). Migratory  
115 species, larger-sized species and species with a wider latitudinal range showed a higher  
116 importance of temperature in explaining abundance changes (Figure S2b).

117 In contrast, neither abundance responses to precipitation increases nor the importance of  
118 precipitation in explaining abundance changes showed significant latitudinal patterns among  
119 species, although, for some species in the tropics, precipitation was found to have a relatively  
120 high importance in explaining abundance changes (Figure 4a, c, S3 and Supplementary Data  
121 S3). Precipitation was shown to have a higher importance in explaining abundance changes in  
122 species with a wider latitudinal range (Figure S3b). When compared within species, three  
123 species showed a significant, one species showed a decrease and another species showed a  
124 hump-shaped curve in abundance responses to precipitation increases along latitudes (Figure  
125 4b, Supplementary Data S3). The importance of precipitation in explaining abundance  
126 changes showed a significant within-species latitudinal pattern for just one species (Figure 4d,  
127 Supplementary Data S3).

## 128 **Discussion**

129 Our results demonstrate the responses in waterbird abundance to temperature increases differ  
130 between tropical and non-tropical regions. At both species and population levels, waterbird

131 abundance generally decreased in the tropics, but increased at higher latitudes, with  
132 increasing temperature. This supports our predictions on among- and within-species patterns  
133 (Supplementary Table S1). Species in the tropics tend to live closer to their upper  
134 temperature limits<sup>15</sup>, have a narrower temperature niche<sup>19</sup> and change their temperature niche  
135 at a slower rate<sup>20</sup>, all of which indicate that tropical species are more vulnerable to increasing  
136 temperatures at the species level. Climate-related extinctions of local populations, typically at  
137 the warmer edge of the species' geographical range, are also more frequent in the tropics,  
138 causing poleward range shifts in many species<sup>21</sup>. While such species-level and population-  
139 level responses to climate change have often been investigated separately to date, our results  
140 provide novel empirical evidence that impacts of temperature increases on tropical  
141 ecosystems can be characterised by species-wide declines in tropical species as well as  
142 population-level responses in wider-ranging species.

143       Nevertheless, we also found that temperature generally explains only a small proportion  
144 of yearly abundance changes in waterbirds, especially in tropical species and at the low-  
145 latitude range margin of species, possibly for four reasons. First, the effect of temperature  
146 changes on waterbird abundance can be indirect especially at lower latitudes. Although  
147 warmer weather conditions can directly increase the survival of waterbirds at higher  
148 latitudes<sup>22</sup>, indirect biotic processes (e.g., changes in food availability), rather than direct  
149 abiotic processes (e.g., heat stress), are reported to be more important mechanisms for  
150 climate-driven abundance changes, especially for higher-level consumers like birds<sup>23,24</sup>. For  
151 example, increases in already-high temperatures at lower latitudes can cause wetlands to dry,  
152 reducing the availability of habitats and food resources for waterbirds<sup>22</sup>. Such an indirect

153 effect of temperature increases could have obscured the relationship between changes in  
154 temperature and abundance, especially in the tropics and at the low-latitude range margins.  
155 Second, many of the waterbirds analysed here are migratory species, which generally have a  
156 higher dispersal ability<sup>25</sup> and track climate niches to a greater extent than resident species<sup>26</sup>,  
157 and thus can be more responsive to changes in local temperature; this was supported by the  
158 positive effect of migratory status on the importance of temperature (Figure S2b). In this  
159 study more non-tropical species tended to be migratory compared to tropical species (151  
160 (96%) of 158 non-tropical species and 12 (78%) of 55 tropical species were migratory),  
161 which may explain the higher importance of local temperature in explaining the abundance of  
162 non-tropical species. Third, observation errors can cause a lower explanatory power of  
163 variables. We may expect larger errors in the tropics, compared to temperate regions, where  
164 waterbird surveys have a longer history and thus surveyors might be better trained. Finally,  
165 other important threats, such as habitat loss and hunting, affect bird abundance,  
166 independently from, or synergistically with, climate change<sup>27</sup>. By testing the effect of  
167 temperature and precipitation changes on yearly abundance changes while estimating long-  
168 term growth rates, our modelling approach controlled for the consistent impacts of such  
169 threats on long-term trends in abundance (see *Statistical Analyses* for more detail).  
170 Nevertheless, those threats can also cause yearly abundance changes and their impacts are  
171 likely to be more severe at lower latitudes<sup>16</sup>, potentially causing temperature to have lower  
172 importance at lower latitudes.

173 Contrary to our hypotheses, there was no clear latitudinal pattern in abundance responses  
174 to precipitation changes, either among or within species. In general water availability,



175 compared to ambient temperature, has been shown to be a more important driver of species  
176 richness and population size at lower latitudes<sup>4,28</sup>. Supporting this, our results showed that  
177 precipitation was more important in explaining the abundance of some tropical species  
178 compared to most species in higher latitudes, although the overall among-species pattern  
179 across latitudes was not significant (Figure 4c). This may be explained by the following two  
180 reasons. First, precipitation changes can affect waterbird species at the river basin scale (often  
181 the scale of 500 to 1,000 km) through effects on water flow into their wetland habitats<sup>29,30</sup>.  
182 Therefore, our analysis at the resolution of 1° grid cells (equivalent to a grain size of 96.49  
183 km) may not have been able to detect such a broad-scale impact of precipitation changes.  
184 Second, waterbird responses to precipitation changes can vary greatly among species, as we  
185 recognised when developing our hypotheses (Supplementary Table S1). While increased  
186 rainfall generally leads to more favourable habitat conditions for waterbirds in dry regions<sup>22,31</sup>,  
187 elevated water levels associated with increased rainfall can cause the loss of shallow-water  
188 habitats, often followed by abundance decreases in certain groups, such as shorebirds<sup>32</sup>. Such  
189 mixed responses to precipitation changes among species<sup>33</sup> may have resulted in the lack of  
190 clear latitudinal patterns, particularly among species, in this study.

191 Our results point to three major implications on the impact of climate change on global  
192 biodiversity. First, despite the relatively low importance of temperature in explaining  
193 waterbird abundance changes, all other things being equal, local temperature increases under  
194 ongoing climate change are likely to pose a more negative impact on species and populations  
195 in the tropics. This provides important evidence for the climate-driven degradation of tropical  
196 ecosystems, which has recently been under debate<sup>34,35</sup>. Although climate change is not the

197 only threat to waterbird species, impacts of other major threats, such as loss and degradation  
198 of wetlands and excessive hunting pressure, seem to be more severe in the tropics too<sup>16</sup>,  
199 indicating that tropical species and populations suffer from multiple anthropogenic threats.  
200 Second, the revealed negative impact of temperature increases in the tropics suggests that  
201 existing severe biases in scientific studies and data towards temperate regions could  
202 underestimate the impact of climate change on species populations at the global scale.  
203 Highlighting the negative impact of climate change on tropical waterbirds should serve to  
204 inspire further studies on other taxa in the tropics. Finally, our finding of contrasting  
205 abundance responses to temperature increases according to latitude highlights the possibility  
206 of global-scale poleward shifts in abundance across species, and associated ecosystem  
207 functions and services. As such shifts can have serious consequences not only for biodiversity  
208 but also for human well-being, assessing latitudinal patterns in biodiversity responses to  
209 climate change at the population, species and community levels warrants further research  
210 attention.

211 **Methods**

212 **Data**

213 *Waterbird count data*

214 Data used in this study comprised site-specific annual counts based on the International  
215 Waterbird Census (IWC) coordinated by Wetlands International and the Christmas Bird  
216 Count (CBC) by the National Audubon Society in the USA, and were compiled in our earlier  
217 study<sup>16</sup>. Note that counts based on these surveys should be described as relative abundance,  
218 as we could not account for imperfect detections in this study. However, we have referred to  
219 them as abundance throughout the manuscript for simplicity. Nevertheless, these count  
220 records should still be comparable among years (see section *Model for estimating abundance*  
221 *responses* for more detail).

222 The IWC, launched in 1967, is a scheme for monitoring waterbird numbers, covering  
223 more than 25,000 sites in over 100 countries with more than 15,000 observers. The  
224 coordination of the IWC is divided into four regional schemes corresponding to the major  
225 migratory flyways of the world: the African-Eurasian Waterbird Census (AEWC), Asian  
226 Waterbird Census (AWC), Caribbean Waterbird Census (CWC) and Neotropical Waterbird  
227 Census (NWC). We did not use data from the CWC, as, having started in 2010, it only  
228 provides short-term data. The survey methodology is essentially the same across the four  
229 regional schemes. Population counts are typically carried out once every year in mid-January  
230 but may include counts between December to February. Additional counts are also conducted  
231 in other months, particularly in July in the Southern Hemisphere, but we only used the  
232 January and February counts for consistency. This means that our data from the Northern  
233 Hemisphere are for non-breeding populations while those in the Southern Hemisphere also  
234 include some breeding populations. In each country that is covered by the survey, national

235 coordinators manage an inventory of wetland sites (hereafter, survey sites), including sites of  
236 international- or national-level recognition (e.g., Ramsar sites, Flyway Network Sites,  
237 Important Bird Areas, national parks etc.). Each survey site is generally defined by  
238 boundaries so that observers know precisely which areas are to be covered in the surveys.  
239 The observers consist of a wide variety of volunteers, but national coordinators usually train  
240 them using materials produced by Wetlands International to ensure the quality of count data.  
241 Survey sites (normally up to a few km<sup>2</sup>) are typically surveyed by about two observers for up  
242 to four hours, while larger sites can require a group of observers working over several days.  
243 Most surveys are conducted on foot, or from a vehicle, with boats involved in a few. The time  
244 of survey on any given day depends on the type of survey site: inland sites are normally  
245 surveyed during the morning or late afternoon, whereas coastal sites are surveyed over the  
246 high tide period (mangrove areas and nearby mudflats are, however, covered during low  
247 tides). Surveys cover waterbirds, defined as bird species that are ecologically dependent on  
248 wetlands<sup>36</sup>. Counts are usually made by scanning flocks of waterbirds with a telescope or  
249 binoculars and counting each species. Zero counts are not always recorded, and thus are  
250 inferred using a set of criteria (see below for more detail). Count records, together with  
251 associated information, are submitted to the national coordinators, who compile the submitted  
252 records, check their validity and submit those records to Wetlands International. See <sup>36,37</sup> for  
253 more details on survey methodology.

254 As the IWC does not cover North America, we also used data based on the CBC, which  
255 has been conducted annually since 1900, and now includes over 2,400 count circles (defined  
256 as survey sites in this study) and involves more than 70,000 observers each year<sup>38</sup>. Each CBC  
257 consists of a tally of all bird species detected within 24.1 km in diameter, on a single day  
258 between 14th December and 5th January. The majority of circles (and most historical data)

259 are from the US and Canada. Observers join groups that survey subunits of the circle during  
260 the course of the day using a variety of transportation methods (mostly on foot, or in a car,  
261 but can include boats, skis, or snowmobiles). The number of observers and the duration of  
262 counts vary among circles and through time. The total number of survey hours per count has  
263 been recorded as a covariate to account for the variable duration of and participation in the  
264 count. We only used records on waterbird species in this paper.

265 We compiled data from each scheme by species, except for data based on the African-  
266 Eurasian Waterbird Census, where data had already been stored by flyway for each species<sup>37</sup>.  
267 As data based on the Neotropical Waterbird Census are only available for 1990 onward, we  
268 only used post-1990 data for other regions as well. The latest records were in 2013. For the  
269 IWC data, we generated zero counts using an established approach<sup>37</sup>, in which we started  
270 with a list of all species observed in each country and assumed a zero count of any species  
271 that were on the list but not recorded at a particular site on a particular day if the site was  
272 surveyed on that day, as shown by the presence of any other species' record(s), and if no  
273 multi-species code related to the species (e.g., Anatinae spp. for species of the genus *Anas*)  
274 was recorded for the site-date combination. We projected all survey sites onto a Behrmann  
275 equal-area cylindrical projection and assigned them to grid cells with a grain size of 96.49 km,  
276 or approximately 1° at 30° N/S. We only used species that were observed at one or more  
277 survey sites for ten or more years since 1990, and this has resulted in 390 species being  
278 analysed in this study (see Supplementary Data S4 for the full list of species). Species groups  
279 used in Fig. 1 are based on the International Ornithological Congress World Bird List<sup>39</sup>:  
280 coursers, gulls, terns and auks (Alcidae, Glareolidae, Laridae and Stercorariidae), grebes and  
281 flamingos (Phoenicopteridae and Podicipedidae), loons and petrels (Gaviidae and  
282 Procellariidae), pelicans, boobies and cormorants (Anhingidae, Fregatidae, Pelecanidae,

283 Phalacrocoracidae and Sulidae), rails and cranes (Aramididae, Gruidae and Rallidae),  
284 shorebirds (Burhinidae, Charadriidae, Haematopodidae, Jacanidae, Recurvirostridae,  
285 Rostratulidae and Scolopacidae), storks, ibises and herons (Ardeidae, Ciconiidae and  
286 Threskiornithidae), and waterfowl (Anatidae and Anhimidae).

287

### 288 *Explanatory variables*

289 To estimate responses in waterbird abundance to changes in temperature and precipitation,  
290 we used monthly mean temperature and precipitation total in the CRU TS v. 4.01 database<sup>40</sup>,  
291 by assigning each site to the 0.5° climatic grid cell including the site. When testing among-  
292 and within-species latitudinal patterns in abundance responses, we also accounted for three  
293 species-level variables—latitudinal geographical range, migratory status and body size—that  
294 are expected to explain among-species variations in responses: data sources of those variables  
295 are shown in Supplementary Table S2.

296

### 297 **Statistical Analyses**

#### 298 *Model for estimating abundance responses*

299 We first estimated for each species at each survey site the rate of abundance changes with  
300 increasing temperature and precipitation as regression coefficients (defined as abundance  
301 responses to temperature or precipitation increases) by applying the Gompertz model of  
302 population growth to count records:

$$303 \quad N_t = N_{t-1} \exp(\alpha + \beta_1 \log N_{t-1} + \beta_2 \text{Temp}_{t-1} + \beta_3 \text{Prec}_{t-1}),$$

304 where  $N_t$ ,  $\text{Temp}_t$ ,  $\text{Prec}_t$  are the abundance of the species, the relevant mean Dec-Feb  
305 temperature and precipitation at the site in year  $t$ , respectively.  $\beta_{1-3}$  are regression coefficients

306 and  $\alpha$  is the intercept. By estimating  $\alpha$  as the population growth rate, this model tests the  
307 effect of temperature and precipitation on yearly changes in abundance while controlling for  
308 long-term trends in abundance. This model structure helps to avoid detecting a spurious  
309 relationship between long-term trends in abundance caused by other threats (e.g., long-term  
310 declines by habitat loss) and those in temperature or precipitation (e.g., long-term warming  
311 temperatures). Taking logs and rearranging to express in terms of relative growth rate result  
312 in the following form:

$$313 \quad \log N_t - \log N_{t-1} = \alpha + \beta_1 \log N_{t-1} + \beta_2 Temp_{t-1} + \beta_3 Prec_{t-1},$$

314 and we used this form to estimate regression coefficients with linear models in R 3.4.1<sup>41</sup>. As  
315 this model does not allow missing values, any missing values between the first and last  
316 survey years at each site for each species were replaced by linear interpolation using the  
317 package zoo<sup>42</sup>; the proportion of missing values (i.e., the effect of interpolation) was  
318 accounted for in the following analysis (see *Latitudinal analysis*). The estimated  $\beta_2$  and  $\beta_3$   
319 represent site-level abundance responses to temperature and precipitation increases,  
320 respectively. Using the same model we also estimated the site-level independent capacity of  
321 temperature and precipitation changes in explaining abundance changes (defined as the  
322 importance of temperature and precipitation) with hierarchical partitioning<sup>18</sup> (measured in our  
323 case as  $R^2$ ) using the package hier.part<sup>43</sup>.

324 As the model described above tests the effect of temperature and precipitation in the  
325 previous year (i.e., year  $t-1$ ) on abundance in the survey year (year  $t$ ), we also separately  
326 tested the immediate effect of temperature and precipitation in the same year (year  $t$ ) as the  
327 abundance survey year. For this analysis we used mean temperature and precipitation in

328 December (year  $t-1$ ), January and February (year  $t$ ) for the IWC sites, where surveys were  
329 conducted either in January or February, and mean Dec temperature and precipitation in year  
330  $t$  for the CBC sites, where surveys were largely conducted in December. We compared AIC  
331 of the two models at each site for each species and used the coefficients in the model with a  
332 smaller AIC.

333 We assumed constant survey efforts over time for the IWC, because regular and  
334 standardized surveys with constant methods, efforts and timing are strongly encouraged in  
335 this scheme (see Supplementary Discussion in<sup>16</sup> for more detail). However, survey efforts in  
336 the CBC are known to vary through time. Following a previously published analysis<sup>44</sup> we  
337 thus accounted for the survey effort effect for the CBC data by using the total number of  
338 survey hours per count as the measure of survey efforts:

$$339 \quad \log N_t - \log N_{t-1} = \alpha + \beta_1 \log N_{t-1} + \beta_2 Temp_{t-1} + \beta_3 Prec_{t-1} + \frac{B\left(\left(\frac{\zeta_t}{\bar{\zeta}}\right)^p - 1\right)}{p},$$

340 where  $\zeta_t$  is the total number of survey hours per count and  $\bar{\zeta}$  is the mean value of  $\zeta_t$ . The  
341 parameters B and p determine a range of relationships between effort and the number of birds  
342 counted<sup>44</sup> and we used the values estimated for each species in our earlier study<sup>16</sup> (see  
343 Supplementary Data S4).

344 We only used survey sites with ten or more records and five or more non-zero records  
345 since 1990 for at least one species, and this has resulted in 1,303,651 count records since  
346 1990 on 390 species at 6,822 sites between  $-55^\circ$  and  $64^\circ$  (Supplementary Figure S1) being  
347 analysed in this study. We aggregated the estimated site-level responses to temperature and  
348 precipitation increases as well as the importance of temperature and precipitation to  $1^\circ \times 1^\circ$   
349 grid cells by calculating the mean site-level estimates across all sites in each grid cell,



350 weighted by the inverse of estimate variance at each site to account for uncertainties. The grid  
351 cell-level estimates (Supplementary Data S2) were then used in the latitudinal analysis  
352 described below and for the species-level maps (Supplementary Data S1). We also calculated  
353 community-level responses (Figure 2) by calculating the mean grid cell-level estimates across  
354 all species observed in each grid cell, weighted by the inverse of estimate variance in each  
355 species to account for uncertainties.

356

### 357 *Latitudinal analysis*

358 We used absolute latitudes to test latitudinal patterns described in Supplementary Table S1  
359 for the following reason. Our data include species that are distributed only in either the  
360 northern or southern hemisphere (one-hemisphere species) as well as those that appear in  
361 both the hemispheres (two-hemisphere species). Some of our hypotheses (e.g., that for  
362 among-species patterns in abundance changes with increasing temperature, shown at the top  
363 of Supplementary Table S1) predict that one-hemisphere species would show a monotonic  
364 increase with raw latitudes while two-hemisphere species would show a U-shaped  
365 relationship along the raw latitudinal gradient with the lowest point at the equator; this makes  
366 analysing those species together in the hierarchical modelling framework described below a  
367 complicated process. With absolute latitudes, in contrast, one-hemisphere and two-  
368 hemisphere species are both expected to show a monotonic increase, making the parameter  
369 estimation much simpler.

370 To explain among- and within-species latitudinal variations in abundance responses to  
371 temperature and precipitation changes as well as the importance of temperature and  
372 precipitation for 213 species with estimates at ten or more grid cells, we adopted the within-

373 subject centring approach<sup>45</sup> under a hierarchical modelling framework to explicitly  
374 distinguish species-level effects (explaining variations in species-level responses between  
375 species) and population-level effects (explaining variations in population-level responses  
376 within species) of explanatory variables. Here we defined each species responses at their  
377 absolute latitudinal range mid-points as species-level responses, and responses within each  
378 grid cell as population-level responses.

379 In this model the species effect  $\mu_s$ , representing the species-level responses to temperature  
380 or precipitation increases in species  $s$ , is drawn from a normal distribution with mean of  $v_s$   
381 and variance of  $\sigma_v^2$ .  $v_s$  is further modelled with species-level explanatory variables:

$$382 \quad v_s = \alpha + \beta_{B1}MIDLAT_s + \beta_{B2}MIDLAT_s^2 + \beta_{B3}LATRANGE_s + \beta_{B4}MIG_s + \beta_{B5}BM_{Bs} + \\ 383 \quad \beta_{B6}PROPNA_s + \eta_s,$$

384 where  $\alpha$  is the global intercept and  $\beta_{B1-B6}$  represent the species-level effects.  $MIDLAT_s$ ,  
385  $LATRANGE_s$ ,  $MIG_s$ ,  $BM_s$ ,  $PROPNA_s$  are species-level explanatory variables; absolute  
386 latitudinal range mid-points, absolute latitudinal geographical range (degree), migration  
387 status (migrant or non-migrant), body mass (g, log<sub>10</sub>-transformed) and the mean proportion of  
388 missing values (i.e., interpolated values) in count records across all sites (%) for species  $s$ ,  
389 respectively.  $\eta_s$  is a random term that accounts for phylogenetic dependence among species  
390 and is drawn from a multivariate normal distribution<sup>46,47</sup>:

$$391 \quad \eta_s \sim MVN(\mathbf{0}, \delta^2 \Sigma_\lambda),$$

$$392 \quad \Sigma_\lambda = \lambda \Sigma + (1 - \lambda) \mathbf{I},$$

393 where  $\Sigma$  is a scaled variance-covariance matrix calculated from an ultrametric phylogenetic  
394 tree (defined below). By scaling  $\Sigma$  to a height of one, we can interpret  $\delta^2$  as the residual  
395 variance<sup>46</sup>. For the strength of phylogenetic signal to vary, we also incorporated Pagel's  $\lambda$ <sup>48,49</sup>

396 into the matrix with the identity matrix  $\mathbf{I}$ . Here  $\lambda$  is a coefficient that multiplies the off-  
397 diagonal elements of  $\Sigma$  and a  $\lambda$  close to zero implies that the phylogenetic signal in the data is  
398 low, suggesting independence in the error structure of the data points, whereas a  $\lambda$  close to  
399 one suggests a good agreement with the Brownian Motion evolution model and thus suggests  
400 correlation in the error structure<sup>46,49</sup>. To incorporate uncertainties<sup>50</sup> in phylogenetic trees in  
401 the calculation of  $\Sigma$ , we used a sample of 100 trees from a comprehensive avian phylogeny<sup>51</sup>  
402 as the prior distribution for our analysis<sup>46</sup>. More specifically, one of the 100 trees was  
403 randomly drawn in each iteration and used for the calculation of  $\Sigma$ .

404 The population-level responses to temperature or precipitation increases  $r_{s,i}$  of species  $s$  in  
405 grid cell  $i$  was then assumed to derive from a normal distribution with mean  $\mu_{s,i}$  and variance  
406  $\sigma_{\mu}^2$ , where  $\mu_{s,i}$  is modelled using the species effect  $\mu_s$ :

$$407 \quad \mu_{s,i} = \mu_s + \beta_{w_{s,1}} \frac{LAT_{s,i} - MIDLAT_s}{LATRANGE_s} + \beta_{w_{s,2}} \left( \frac{LAT_{s,i} - MIDLAT_s}{LATRANGE_s} \right)^2 + \beta_{w_{s,3}} pNA_{s,i} + \gamma_{s,i}.$$

408 Here  $\beta_{w_{s,1-3}}$  represents the population-level effect of absolute latitudes  $LAT_{s,i}$  (in the form of  
409 linear and quadratic terms, to test non-linear patterns) and the mean proportion of missing  
410 values (i.e., interpolated values) in count records across all sites  $pNA_{s,i}$  (%) of grid cell  $i$  for  
411 species  $s$ . Here within-species variations in population-level responses ( $\mu_{s,i} - \mu_s$ ) are  
412 explained by within-species variations in absolute latitudes ( $LAT_{s,i} - MIDLAT_s$ ), divided by  
413 the absolute latitudinal geographical range of each species  $LATRANGE_s$ , so that the estimated  
414 effects of absolute latitudes are comparable among species with varying latitudinal range size.  
415 The species-specific  $\beta_{w_{s,1-3}}$  is the random effect each governed by hyper-parameters as:

$$416 \quad \beta_{w_{s,j}} \sim Normal(h\beta_{w_j}, \sigma_{\beta_{w_j}}^2).$$

417  $\gamma_{s,i}$  accounts for spatial autocorrelation within each species and is drawn from an intrinsic  
418 Gaussian conditional autoregressive (CAR) prior distribution with variance  $\sigma_{\gamma_s}^2$ :

419 
$$\gamma_{s,i} | \gamma_{s,k} \sim \text{Normal}\left(\frac{\sum_{i \neq k} w_{i,k} \gamma_{s,k}}{n_i}, \frac{\sigma_{\gamma_s}^2}{n_i}\right),$$

420 where  $w_{i,k} = 1$  if grid cells  $i$  and  $k$  are neighbours, and 0 otherwise.  $n_i$  is the total number of  
421 neighbours of grid cell  $i$  and neighbours here are defined as those grid cells directly adjacent,  
422 including those diagonal.  $\sigma_{\gamma_s}^2$  controls the amount of variation between the random effects.

423 We tested latitudinal patterns in the importance of temperature and precipitation using  
424 essentially the same model but the population-level importance of temperature or  
425 precipitation  $imp_{s,i}$  of species  $s$  in grid cell  $i$  was assumed to derive from a beta distribution  
426 with mean  $c_{s,i}$  and variance  $\frac{\alpha_i \beta_i}{(\alpha_i + \beta_i)^2 (\alpha_i + \beta_i + 1)}$  with a logit link function:

427 
$$\text{logit}(c_{s,i}) = \mu_s + \beta_{w_{s,1}} \frac{LAT_{s,i} - MIDLAT_s}{LATRANGE_s} + \beta_{w_{s,2}} \left( \frac{LAT_{s,i} - MIDLAT_s}{LATRANGE_s} \right)^2 + \beta_{w_{s,3}} pNA_{s,i} + \gamma_{s,i},$$

428 
$$\alpha_i = c_{s,i} \varphi_i,$$

429 
$$\beta_i = (1 - c_{s,i}) \varphi_i.$$

430 The models were implemented with OpenBUGS 3.2.3<sup>52</sup> and the R2OpenBUGS package<sup>53</sup>  
431 in R 3.4.1<sup>41</sup>. As non-informative prior distributions, we used a Gamma distribution with mean  
432 of 1 and variance of 100 for  $\varphi_i$  and the inverse of  $\sigma_v^2$ ,  $\delta^2$ ,  $\sigma_\mu^2$ ,  $\sigma_{\beta_{W_j}}^2$  and  $\sigma_{\gamma_s}^2$ , a uniform  
433 distribution on the interval [0, 1] for  $\lambda$ , normal distributions with mean of 0 and variance of  
434 100 for  $\alpha$ ,  $\beta_{Bk}$ , and  $h\beta_{W_j}$ . Each MCMC algorithm was run with three chains with different  
435 initial values for 30,000 iterations with the first 10,000 discarded as burn-in and the  
436 remainder thinned to one in every four iterations to save storage space. Model convergence  
437 was checked with R-hat values.

438 Due to differences in the definition of species between the two sources used<sup>51,54</sup>, we  
439 combined two separate species defined in the BirdLife Checklist<sup>54</sup> into one in four cases for  
440 this species-level analysis: Kentish plover *Charadrius alexandrinus* and snowy plover *C.*  
441 *nivosus*, common snipe *Gallinago gallinago* and Wilson's snipe *G. delicata*, European

442 herring gull *Larus argentatus* and Arctic herring gull *L. smithsonianus*, and common  
443 moorhen *Gallinula chloropus* and common gallinule *G. galeata*. *Larus glaucoides thayeri*  
444 was excluded from the latitudinal analysis as it is not included in either database. We also  
445 excluded from the analysis eight seabird species in Alcidae and Sulidae as neither the IWC  
446 nor CBC necessarily targets seabird species.

447 We also used R packages `ape`<sup>55</sup>, `data.table`<sup>56</sup>, `dplyr`<sup>57</sup>, `ggplot2`<sup>58</sup>, `gridExtra`<sup>59</sup>, `mapdata`<sup>60</sup>,  
448 `plyr`<sup>61</sup>, `png`<sup>62</sup>, `RcolorBrewer`<sup>63</sup>, `rgdal`<sup>64</sup>, `raster`<sup>65</sup> and `viridis`<sup>66</sup>.

449

#### 450 **Data Availability**

451 The waterbird count data used in this study are collated and managed by Wetlands  
452 International and the National Audubon Society, and are available from Wetlands  
453 International at: <http://iwc.wetlands.org/>. The estimated abundance responses to temperature  
454 and precipitation as well as the importance of temperature and precipitation for each grid cell  
455 for each species are available as Supplementary Data S2. All the data on explanatory  
456 variables are freely available as specified in Supplementary Table S2.

457

#### 458 **Code Availability**

459 All the R codes used for the analyses are available as Supplementary Data S5-7.

460

461 **References**

- 462 1 Chen, I. C., Hill, J. K., Ohlemüller, R., Roy, D. B. & Thomas, C. D. Rapid range shifts of  
463 species associated with high levels of climate warming. *Science* **333**, 1024-1026 (2011).
- 464 2 Thackeray, S. J. *et al.* Phenological sensitivity to climate across taxa and trophic levels.  
465 *Nature* **535**, 241 (2016).
- 466 3 Stephens, P. A. *et al.* Consistent response of bird populations to climate change on two  
467 continents. *Science* **352**, 84-87 (2016).
- 468 4 Pearce-Higgins, J. W. *et al.* Geographical variation in species' population responses to  
469 changes in temperature and precipitation. *Proceedings of the Royal Society of London B:*  
470 *Biological Sciences* **282**, 20151561 (2015).
- 471 5 Pecl, G. T. *et al.* Biodiversity redistribution under climate change: Impacts on ecosystems  
472 and human well-being. *Science* **355**, eaai9214 (2017).
- 473 6 Perez, T. M., Stroud, J. T. & Feeley, K. J. Thermal trouble in the tropics. *Science* **351**,  
474 1392-1393 (2016).
- 475 7 Feeley, K. J., Stroud, J. T., Perez, T. M. & Kühn, I. Most 'global' reviews of species'  
476 responses to climate change are not truly global. *Diversity and Distributions* **23**, 231-234  
477 (2017).
- 478 8 Spooner, F. E. B., Pearson, R. G. & Freeman, R. Rapid warming is associated with  
479 population decline among terrestrial birds and mammals globally. *Global Change*  
480 *Biology* **24**, 4521-4531 (2018).
- 481 9 Martay, B. *et al.* Impacts of climate change on national biodiversity population trends.  
482 *Ecography* **40**, 1139-1151 (2017).
- 483 10 IUCN. *IUCN Red List Categories and Criteria: Version 3.1.* (Species Survival  
484 Commission. IUCN, 2001).

- 485 11 Winfree, R., W. Fox, J., Williams, N. M., Reilly, J. R. & Cariveau, D. P. Abundance of  
486 common species, not species richness, drives delivery of a real-world ecosystem service.  
487 *Ecology Letters* **18**, 626-635 (2015).
- 488 12 Mills, S. C. *et al.* European butterfly populations vary in sensitivity to weather across  
489 their geographical ranges. *Global Ecology and Biogeography* **26**, 1374-1385 (2017).
- 490 13 Bowler, D. E. *et al.* Cross-realm assessment of climate change impacts on species'  
491 abundance trends. *Nature Ecology & Evolution* **1**, 0067 (2017).
- 492 14 Myers-Smith, I. H. *et al.* Climate sensitivity of shrub growth across the tundra biome.  
493 *Nature Climate Change* **5**, 887-892 (2015).
- 494 15 Khaliq, I., Hof, C., Prinzing, R., Böhning-Gaese, K. & Pfenninger, M. Global variation  
495 in thermal tolerances and vulnerability of endotherms to climate change. *Proceedings of*  
496 *the Royal Society B: Biological Sciences* **281**, 20141097 (2014).
- 497 16 Amano, T. *et al.* Successful conservation of global waterbird populations depends on  
498 effective governance. *Nature* **553**, 199-202 (2018).
- 499 17 Ramsar Convention on Wetlands. *Global Wetland Outlook: State of the World's Wetlands*  
500 *and their Services to People*. (Ramsar Convention Secretariat, 2018).
- 501 18 Mac Nally, R. Hierarchical partitioning as an interpretative tool in multivariate inference.  
502 *Australian Journal of Ecology* **21**, 224-228 (1996).
- 503 19 Cadena, C. D. *et al.* Latitude, elevational climatic zonation and speciation in New World  
504 vertebrates. *Proceedings of the Royal Society B: Biological Sciences* **279**, 194-201 (2012).
- 505 20 Jezkova, T. & Wiens, J. J. Rates of change in climatic niches in plant and animal  
506 populations are much slower than projected climate change. *Proceedings of the Royal*  
507 *Society B: Biological Sciences* **283**, 20162104 (2016).

- 508 21 Wiens, J. J. Climate-related local extinctions are already widespread among plant and  
509 animal species. *PLOS Biology* **14**, e2001104 (2016).
- 510 22 Maclean, I. M. D., Rehfisch, M. M., Delany, S. & Robinson, R. A. *The effects of climate*  
511 *change on migratory waterbirds within the African-Eurasian flyway*. (The Agreement on  
512 the Conservation of African-Eurasian Migratory Waterbirds Secretariat, 2007).
- 513 23 Ockendon, N. *et al.* Mechanisms underpinning climatic impacts on natural populations:  
514 altered species interactions are more important than direct effects. *Global Change*  
515 *Biology* **20**, 2221-2229 (2014).
- 516 24 Cahill, A. E. *et al.* How does climate change cause extinction? *Proc. R. Soc. B-Biol. Sci.*  
517 **280**, doi:20121890 (2013).
- 518 25 Angert, A. L. *et al.* Do species' traits predict recent shifts at expanding range edges?  
519 *Ecology Letters* **14**, 677-689 (2011).
- 520 26 Gómez, C., Tenorio, E. A., Montoya, P. & Cadena, C. D. Niche-tracking migrants and  
521 niche-switching residents: evolution of climatic niches in New World warblers  
522 (Parulidae). *Proceedings of the Royal Society B: Biological Sciences* **283**, 20152458  
523 (2016).
- 524 27 Betts, M. G., Gutiérrez Illán, J., Yang, Z., Shirley, S. M. & Thomas, C. D. Synergistic  
525 effects of climate and land-cover change on long-term bird population trends of the  
526 western USA: a test of modeled predictions. *Frontiers in Ecology and Evolution* **7** (2019).
- 527 28 Hawkins, B. A. *et al.* Energy, water, and broad-scale geographic patterns of species  
528 richness. *Ecology* **84**, 3105-3117 (2003).
- 529 29 Haig, S. M., Murphy, S. P., Matthews, J. H., Arismendi, I. & Safeeq, M. Climate-altered  
530 wetlands challenge waterbird use and migratory connectivity in arid landscapes. *Scientific*  
531 *Reports* **9**, 4666 (2019).



- 532 30 Kingsford, R. T., Bino, G. & Porter, J. L. Continental impacts of water development on  
533 waterbirds, contrasting two Australian river basins: Global implications for sustainable  
534 water use. *Global Change Biology* **23**, 4958-4969 (2017).
- 535 31 Kleijn, D., Cherkaoui, I., Goedhart, P. W., van der Hout, J. & Lammertsma, D.  
536 Waterbirds increase more rapidly in Ramsar-designated wetlands than in unprotected  
537 wetlands. *Journal of Applied Ecology* **51**, 289-298 (2014).
- 538 32 Canepuccia, A. D., Isacch, J. P., Gagliardini, D. A., Escalante, A. H. & Iribarne, O. O.  
539 Waterbird response to changes in habitat area and diversity generated by rainfall in a SW  
540 Atlantic coastal lagoon. *Waterbirds* **30**, 541-553 (2007).
- 541 33 Romano, M., Barberis, I., Pagano, F. & Maidagan, J. Seasonal and interannual variation  
542 in waterbird abundance and species composition in the Melincu ̄ saline lake, Argentina.  
543 *European Journal of Wildlife Research* **51**, 1-13 (2005).
- 544 34 Lister, B. C. & Garcia, A. Climate-driven declines in arthropod abundance restructure a  
545 rainforest food web. *Proceedings of the National Academy of Sciences* **115**, E10397-  
546 E10406 (2018).
- 547 35 Willig, M. R. *et al.* Populations are not declining and food webs are not collapsing at the  
548 Luquillo Experimental Forest. *Proceedings of the National Academy of Sciences* **116**,  
549 12143-12144 (2019).
- 550 36 Delany, S. *Guidance on waterbird monitoring methodology: field protocol for waterbird*  
551 *counting*. (Wetlands International, 2010).
- 552 37 van Roomen, M., van Winden, E. & van Turnhout, C. *Analyzing population trends at the*  
553 *flyway level for bird populations covered by the African Eurasian Waterbird Agreement:*  
554 *details of a methodology*. (SOVON Dutch Centre for Field Ornithology, 2011).
- 555 38 LeBaron, G. S. *The 115th Christmas Bird Count*. (National Audubon Society, 2015).

- 556 39 Gill, F. & Donsker, D. *IOC World Bird List (v 5.1)* (Available at:  
557 <http://www.worldbirdnames.org/>, 2015).
- 558 40 Harris, I., Jones, P. D., Osborn, T. J. & Lister, D. H. Updated high-resolution grids of  
559 monthly climatic observations - the CRU TS3.10 Dataset. *International Journal of*  
560 *Climatology* **34**, 623-642 (2014).
- 561 41 R Core Team. *R: A language and environment for statistical computing*. (R Foundation  
562 for Statistical Computing, 2017).
- 563 42 Zeileis, A. & Grothendieck, G. zoo: S3 infrastructure for regular and irregular time series.  
564 *Journal of Statistical Software* **14**, 1-27 (2005).
- 565 43 Walsh, C. & Nally, R. M. *hier.part: hierarchical partitioning. R package version 1.0-4*.  
566 (2013).
- 567 44 Link, W. A. & Sauer, J. R. Seasonal components of avian population change: joint  
568 analysis of two large-scale monitoring programs. *Ecology* **88**, 49-55 (2007).
- 569 45 van de Pol, M. & Wright, J. A simple method for distinguishing within- versus between-  
570 subject effects using mixed models. *Animal Behaviour* **77**, 753-758 (2009).
- 571 46 de Villemereuil, P., Wells, J., Edwards, R. & Blomberg, S. Bayesian models for  
572 comparative analysis integrating phylogenetic uncertainty. *BMC Evolutionary Biology* **12**,  
573 102 (2012).
- 574 47 Abadi, F. *et al.* Importance of accounting for phylogenetic dependence in multi-species  
575 mark-recapture studies. *Ecological Modelling* **273**, 236-241 (2014).
- 576 48 Pagel, M. Inferring the historical patterns of biological evolution. *Nature* **401**, 877-884  
577 (1999).
- 578 49 Freckleton, R. P., Harvey, P. H. & Pagel, M. Phylogenetic analysis and comparative data:  
579 A test and review of evidence. *American Naturalist* **160**, 712-726 (2002).

- 580 50 Donoghue, M. J. & Ackerly, D. D. Phylogenetic uncertainties and sensitivity analyses in  
581 comparative biology. *Philosophical Transactions of the Royal Society of London B:  
582 Biological Sciences* **351**, 1241-1249 (1996).
- 583 51 Jetz, W., Thomas, G. H., Joy, J. B., Hartmann, K. & Mooers, A. O. The global diversity  
584 of birds in space and time. *Nature* **491**, 444-448 (2012).
- 585 52 Spiegelhalter, D., Thomas, A., Best, N. & Lunn, D. *OpenBUGS user manual version  
586 3.2.3*. (2014).
- 587 53 Sturtz, S., Ligges, U. & Gelman, A. R2WinBUGS: a package for running WinBUGS  
588 from R. *Journal of Statistical Software* **12**, 1-16 (2005).
- 589 54 BirdLife International. *The BirdLife checklist of the birds of the world: Version 7*  
590 (Downloaded from  
591 [http://www.birdlife.org/datazone/userfiles/file/Species/Taxonomy/BirdLife\\_Checklist\\_V  
592 ersion\\_70.zip](http://www.birdlife.org/datazone/userfiles/file/Species/Taxonomy/BirdLife_Checklist_V<br/>592 ersion_70.zip). 2014).
- 593 55 Paradis, E., Claude, J. & Strimmer, K. APE: analyses of phylogenetics and evolution in R  
594 language. *Bioinformatics* **20**, 289-290 (2004).
- 595 56 Dowle, M. & Srinivasan, A. *data.table: extension of 'data.frame'*. *R package version  
596 1.10.4-3*. (2017).
- 597 57 Wickham, H., Francois, R., Henry, L. & Muller, K. *dplyr: a grammar of data  
598 manipulation. R package version 0.7.4*. (2017).
- 599 58 Wickham, H. *ggplot2: elegant graphics for data analysis*. (Springer-Verlag New York,  
600 2016).
- 601 59 Auguie, B. *gridExtra: miscellaneous functions for "grid" graphics. R package version 2.3.  
602 (2017)*.
- 603 60 Brownrigg, R. *mapdata: extra map databases. R package version 2.3.0*. (2018).

- 604 61 Wickham, H. The split-apply-combine strategy for data analysis. *Journal of Statistical*  
605 *Software* **40**, 1-29 (2011).
- 606 62 Urbanek, S. *png: read and write PNG images. R package version 0.1-7.* (2013).
- 607 63 Neuwirth, E. *RColorBrewer: ColorBrewer Palettes. R package version 1.1-2.* (2014).
- 608 64 Bivand, R., Keitt, T. & Rowlingson, B. *rgdal: bindings for the geospatial data*  
609 *abstraction library. R package version 1.2-8.* (2017).
- 610 65 Hijmans, R. J. *raster: geographic data analysis and modeling. R package version 2.6-7.*  
611 (2017).
- 612 66 Garnier, S. *viridis: default color maps from 'matplotlib'. R package version 0.5.1.* (2018).

613

#### 614 **Acknowledgements**

615 We thank the coordinators, thousands of volunteer counters and funders of the International  
616 Waterbird Census and Christmas Bird Count. T.A. was supported by the Grantham  
617 Foundation for the Protection of the Environment, the Kenneth Miller Trust and the  
618 Australian Research Council Future Fellowship (FT180100354). T.S. was funded by a Royal  
619 Society Wolfson Merit Award (WM170050) and by the National Research, Development and  
620 Innovation Office of Hungary (ÉLVONAL KKP-126949, K-116310). H.S.W. was supported  
621 by the Cambridge Trust Cambridge-Australia Poynton Scholarship and the Cambridge  
622 Department of Zoology JS Gardiner Fellowship. W.J.S. is supported by Arcadia and The  
623 David and Claudia Harding Foundation. This work is also funded by EU Horizon 2020 BACI  
624 project (Grant Agreement 640176), Ministry of the Environment of Japan, Environment  
625 Canada, AEWa Secretariat, EU LIFE+ NGO Operational Grant, MAVa Foundation, Swiss  
626 Federal Office for Environment and Nature, French Ministry of Environment and Sustainable  
627 Development, UK Department of Food and Rural Affairs, Norwegian Nature Directorate,

628 Dutch Ministry of Economics, Agriculture and Innovation, DOB Ecology and Wetlands

629 International members. Thanks to M. Amano for all the support.

630 **Author contributions**

631 T.A. designed the study. T.A., T.S., H.S.W., B.S., S.N., T.M., T.L., D.B. and N.L.M.

632 collected and prepared data for the analyses. T.A. analysed the data and wrote the paper. All

633 authors discussed the results and commented on the manuscript at all stages.

634 **Competing interests**

635 The authors declare no competing interests.

636 **Additional information**

637 **Supplementary information** is available for this paper.

638 **Correspondence and requests for materials** should be addressed to T.A.

639 (t.amano@uq.edu.au)

640

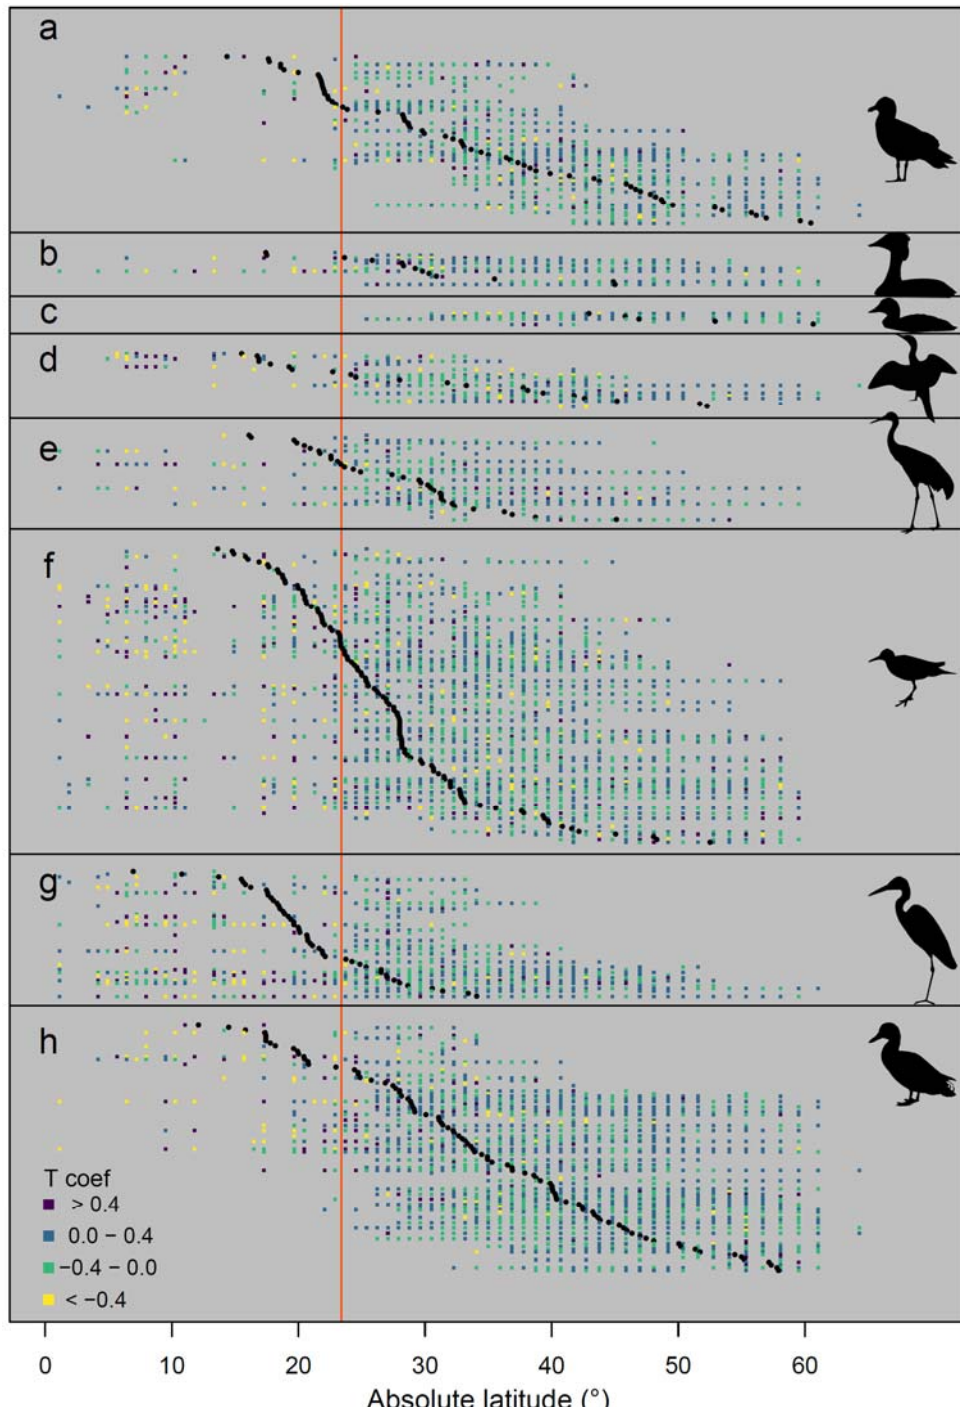

**Fig. 1. Latitudinal distribution of abundance responses to changes in temperature (the rate of abundance changes with increasing temperature) for each species.** Each horizontal row of squares shows the absolute latitudes of  $1^\circ \times 1^\circ$  grid cells with estimates for each of the 390 species in (a) coursers, gulls, terns and auks, (b) grebes and flamingos, (c) loons and petrels, (d) pelicans, boobies and cormorants, (e) rails and cranes, (f) shorebirds, (g) storks, ibises and herons, and (h) waterfowl (see Methods for the definition of each species group). Black circles indicate the latitudinal range mid-point (i.e., median absolute latitude of geographical range) of each species. The area on the left of the red vertical line (absolute latitude  $< 23.4^\circ$ ) represents the tropical region.

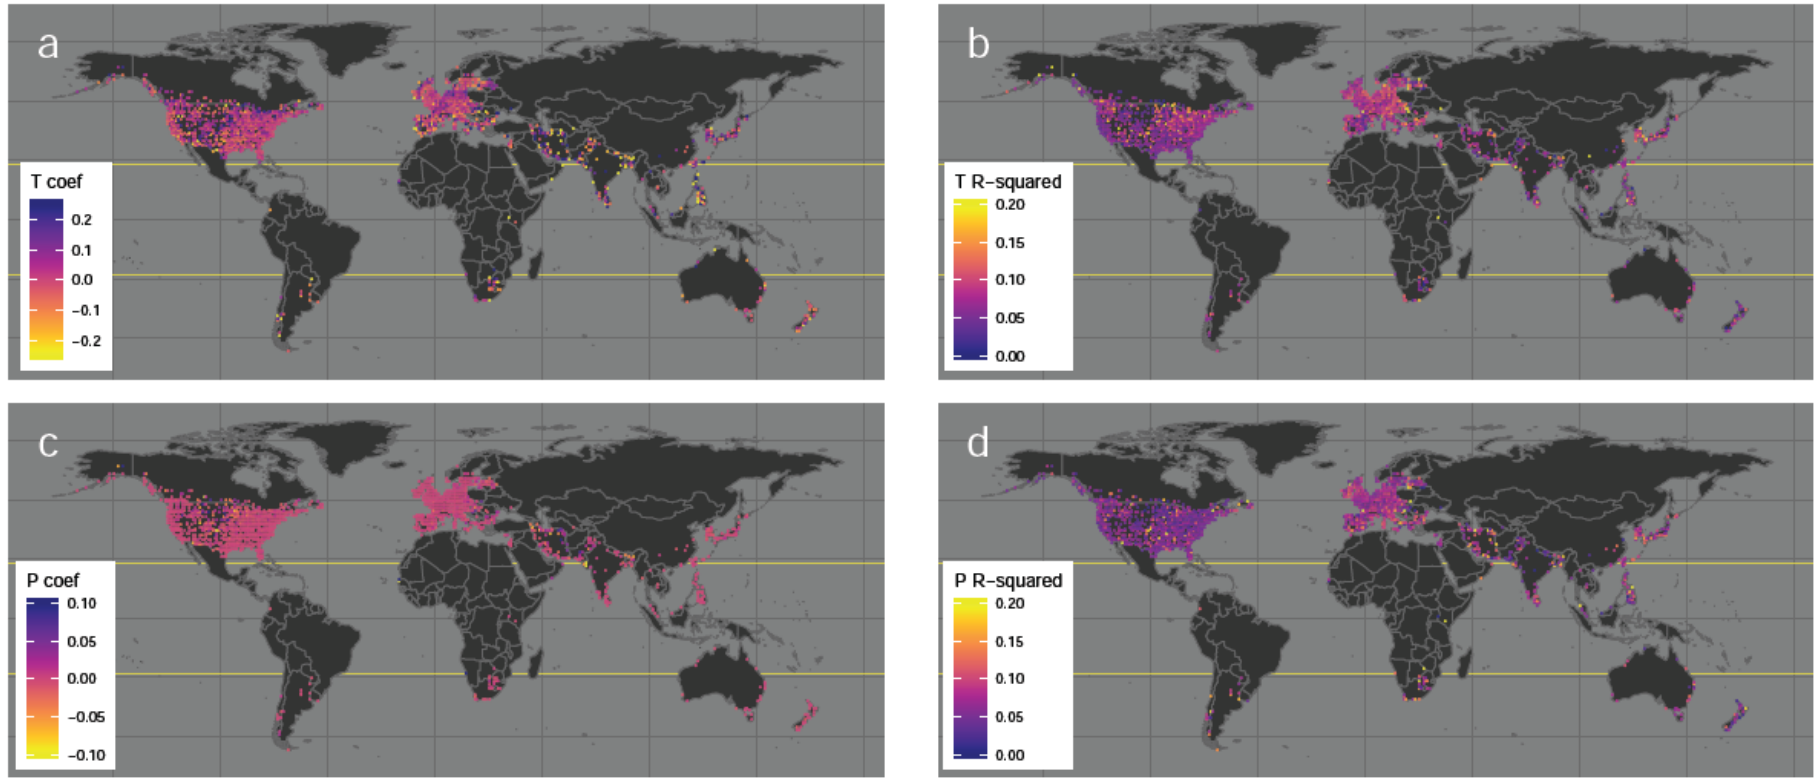

651

652 **Fig. 2. Mean abundance responses across 390 waterbird species to changes in temperature and precipitation in each  $1^\circ \times 1^\circ$  grid cell. The**  
653 **rate of abundance changes with increasing temperature (a), the independent capacity of temperature in explaining abundance changes (b), the**  
654 **rate of abundance changes with increasing precipitation (c) and the independent capacity of precipitation in explaining abundance changes (d). The**  
655 **region between the yellow solid lines is the tropics.**

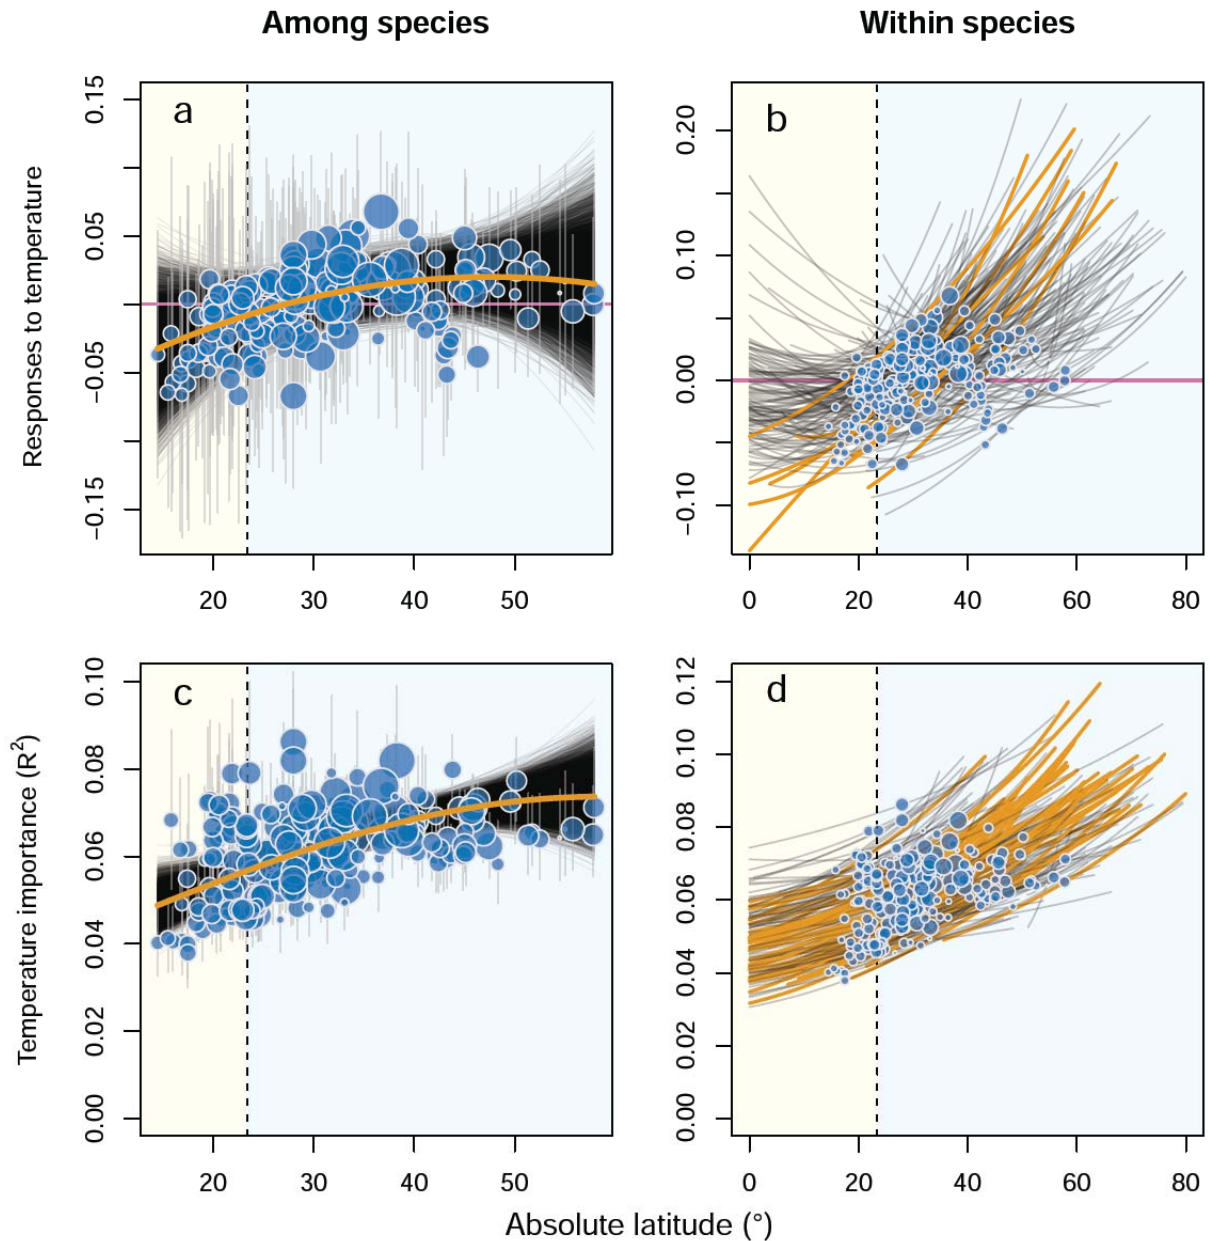

**Fig. 3. Latitudinal patterns in waterbird abundance responses to temperature increases.**

The rate of abundance changes with increasing temperature at each species' range mid-points (a) and within each species (b), the independent capacity of temperature in explaining abundance changes at each species' range mid-points (c) and within each species (d). In (a) and (c) orange lines represent the among-species latitudinal patterns based on posterior median coefficients with black lines showing patterns based on all posterior samples. Blue circles indicate the estimated responses at each species' range mid-points (also shown in (b) and (d)) with grey vertical lines showing 95% credible intervals; circle size, the absolute latitudinal range size. In (b) and (d) regression lines show the estimated within-species latitudinal patterns for each species based on posterior median coefficients; orange lines represent significant patterns. The yellow area (absolute latitude  $< 23.4^{\circ}$ ) represents the tropical region.



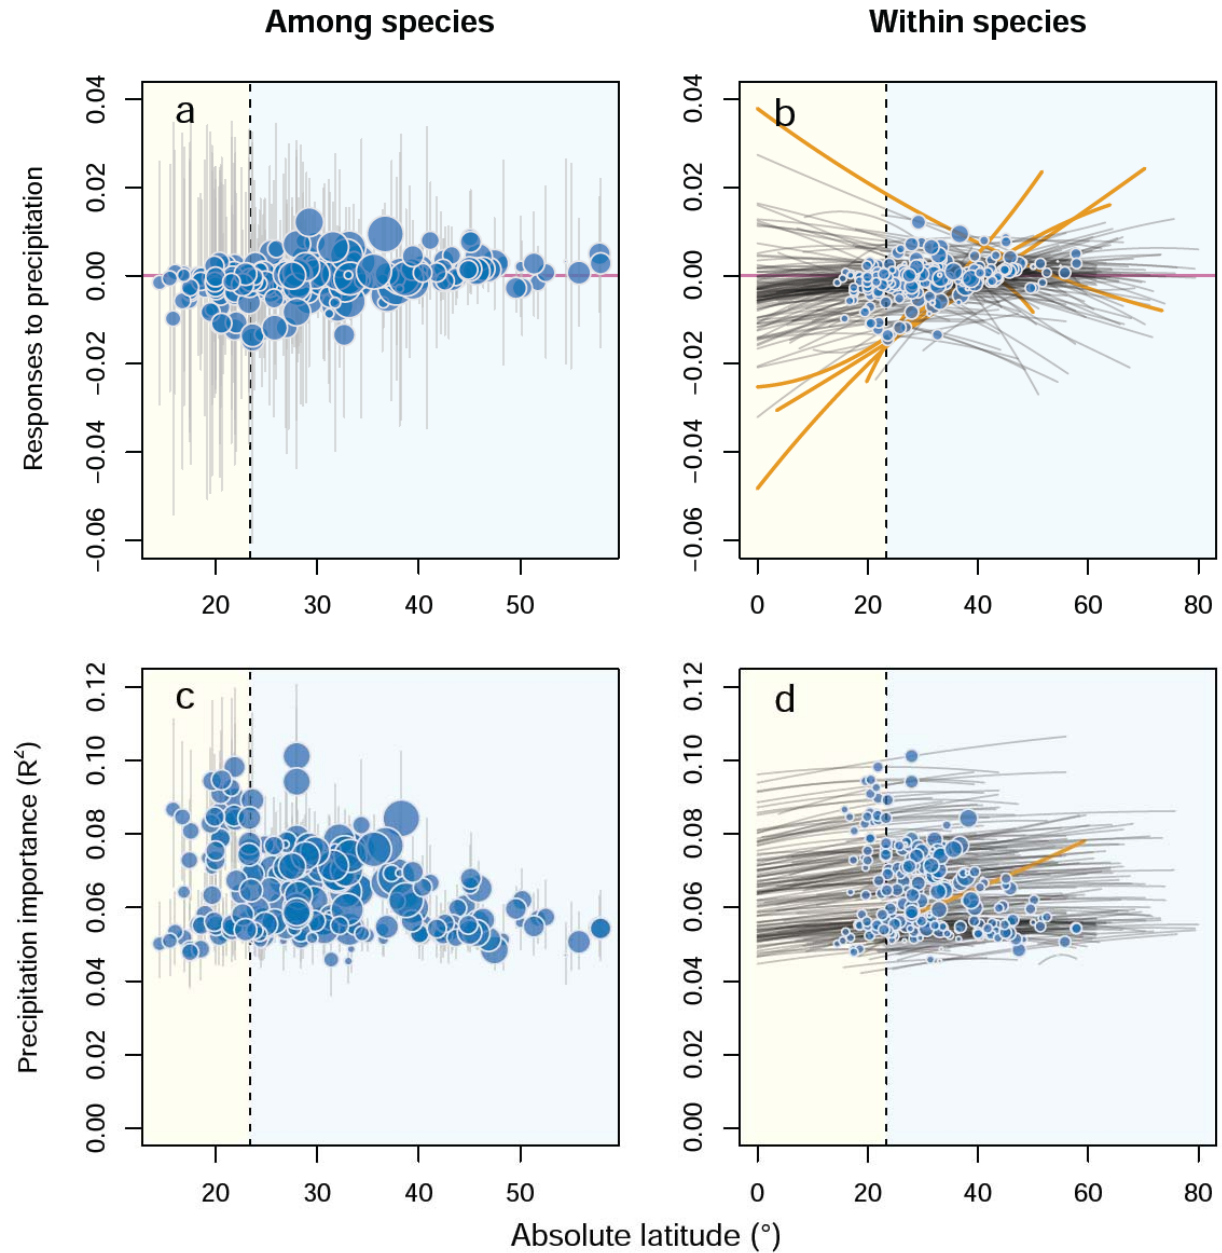

**Fig. 4. Latitudinal patterns in waterbird abundance responses to precipitation increases.**

The rate of abundance changes with increasing precipitation for each species' range mid-points (a) and within each species (b), the independent capacity of precipitation in explaining abundance changes at each species' range mid-points (c) and within each species (d). In (a) and (c) orange lines represent the among-species latitudinal patterns based on posterior median coefficients with black lines showing patterns based on all posterior samples. Blue circles indicate the estimated responses at each species' range mid-points (also shown in (b) and (d)) with grey vertical lines showing 95% credible intervals; circle size, the absolute latitudinal range size. In (b) and (d) regression lines show the estimated within-species latitudinal patterns for each species based on posterior median coefficients; orange lines represent significant patterns. The yellow area (absolute latitude < 23.4°) represents the tropical region.
